# Supplementary material for: Neutralization Characteristics of HIV-1 CRF01_AE Env Clones From Infections in China
Source: Research Square preprint supplement (doi:10.21203/rs.3.rs-568729/v2), 2021-09-22
Supplement: Supplementary file 1 [file 9bb7af44ef9f2667c61626a7.docx]

**Supplementary**

TableS1. Demographic and Biologic Properties of Molecularly Cloned Env-pseudotyped Strains of CRF_01AE HIV-1

| Samples | Env clone | Subtype | Location | Source | Date Sample Collected (yr) |
| --- | --- | --- | --- | --- | --- |
| SZ18S0004 | SZ18S0004.3 | CRF_01AE | Shenzhen,China | Plasma | 2018 |
| FJ18S0081 | FJ18S0081.5 | CRF_01AE | Fujian,China | Plasma | 2018 |
| GD18S0125 | GD18S0125.2 | CRF_01AE | Guangdong,China | Plasma | 2018 |
| 2019GX001 | 2019GX001.2 | CRF_01AE | Guangxi, China | Plasma | 2019 |
| 2019GX001.3 | CRF_01AE | Guangxi, China | Plasma | 2019 |
| 2019GX001.6 | CRF_01AE | Guangxi, China | Plasma | 2019 |
| 2019GX001.12 | CRF_01AE | Guangxi, China | Plasma | 2019 |
| 2019GX001.14 | CRF_01AE | Guangxi, China | Plasma | 2019 |
| 2019GX001.15 | CRF_01AE | Guangxi, China | Plasma | 2019 |
| 2019GX001.16 | CRF_01AE | Guangxi, China | Plasma | 2019 |
| 2019GX001.17 | CRF_01AE | Guangxi, China | Plasma | 2019 |
| 2019GX001.27 | CRF_01AE | Guangxi, China | Plasma | 2019 |
| 2019GX001.44 | CRF_01AE | Guangxi, China | Plasma | 2019 |
| 2019GX001.56 | CRF_01AE | Guangxi, China | Plasma | 2019 |
| 2019GX001.58 | CRF_01AE | Guangxi, China | Plasma | 2019 |
| 2019GX001.59 | CRF_01AE | Guangxi, China | Plasma | 2019 |
| 2019GX001.60 | CRF_01AE | Guangxi, China | Plasma | 2019 |
| 2019GX001.63 | CRF_01AE | Guangxi, China | Plasma | 2019 |
| 2019GX001.64 | CRF_01AE | Guangxi, China | Plasma | 2019 |
| 2019GX001.72 | CRF_01AE | Guangxi, China | Plasma | 2019 |
| 2019GX003 | 2019GX003.14 | CRF_01AE | Guangxi, China | Plasma | 2019 |
| 2019GX011 | 2019GX011.3 | CRF_01AE | Guangxi, China | Plasma | 2019 |
| 2019GX014 | 2019GX014.3 | CRF_01AE | Guangxi, China | Plasma | 2019 |
| 2019GX030 | 2019GX030.3 | CRF_01AE | Guangxi, China | Plasma | 2019 |
| 2019GX030.4 | CRF_01AE | Guangxi, China | Plasma | 2019 |
| 2019GX030.8 | CRF_01AE | Guangxi, China | Plasma | 2019 |
| 2019GX035 | 2019GX035.7 | CRF_01AE | Guangxi, China | Plasma | 2019 |
| 2019GX037 | 2019GX037.4 | CRF_01AE | Guangxi, China | Plasma | 2019 |
| 2019GX037.5 | CRF_01AE | Guangxi, China | Plasma | 2019 |
| 2019GX037.6 | CRF_01AE | Guangxi, China | Plasma | 2019 |
| 2019GX037.9 | CRF_01AE | Guangxi, China | Plasma | 2019 |
| 2019GX037.10 | CRF_01AE | Guangxi, China | Plasma | 2019 |
| 2019GX044 | 2019GX044.4 | CRF_01AE | Guangxi, China | Plasma | 2019 |
| 2019GX050 | 2019GX050.1 | CRF_01AE | Guangxi, China | Plasma | 2019 |
| 2019GX050.9 | CRF_01AE | Guangxi, China | Plasma | 2019 |
| 2019GX057 | 2019GX057.8 | CRF_01AE | Guangxi, China | Plasma | 2019 |

TableS2 Primers of nest PCR

| Subtype | Name | Sequence |
| --- | --- | --- |
|
| AE | HZAEOB | 5-TAGAGCCCTGGAATCATCCGGGAAG-3 |
| HZAEOE | 5- TTACTACTTGTTACTGCTCCATGT-3 |
| HZAEIB | 5-CACCGATCAAGCTTTAGGCATCTCCTATGGCAGGAAGAAG-3 |
| HZAEIE | 5-AGCTGGATCCGTCTTGAGATACTGCTCCTACTC -3 |
